# Supplementary material for: CT-based conventional radiomics and quantification of intratumoral heterogeneity for predicting benign and malignant renal lesions
Source: PubMed Central journal article supplement (PMC11446113; doi:10.1186/s40644-024-00775-8), 2024-10-02

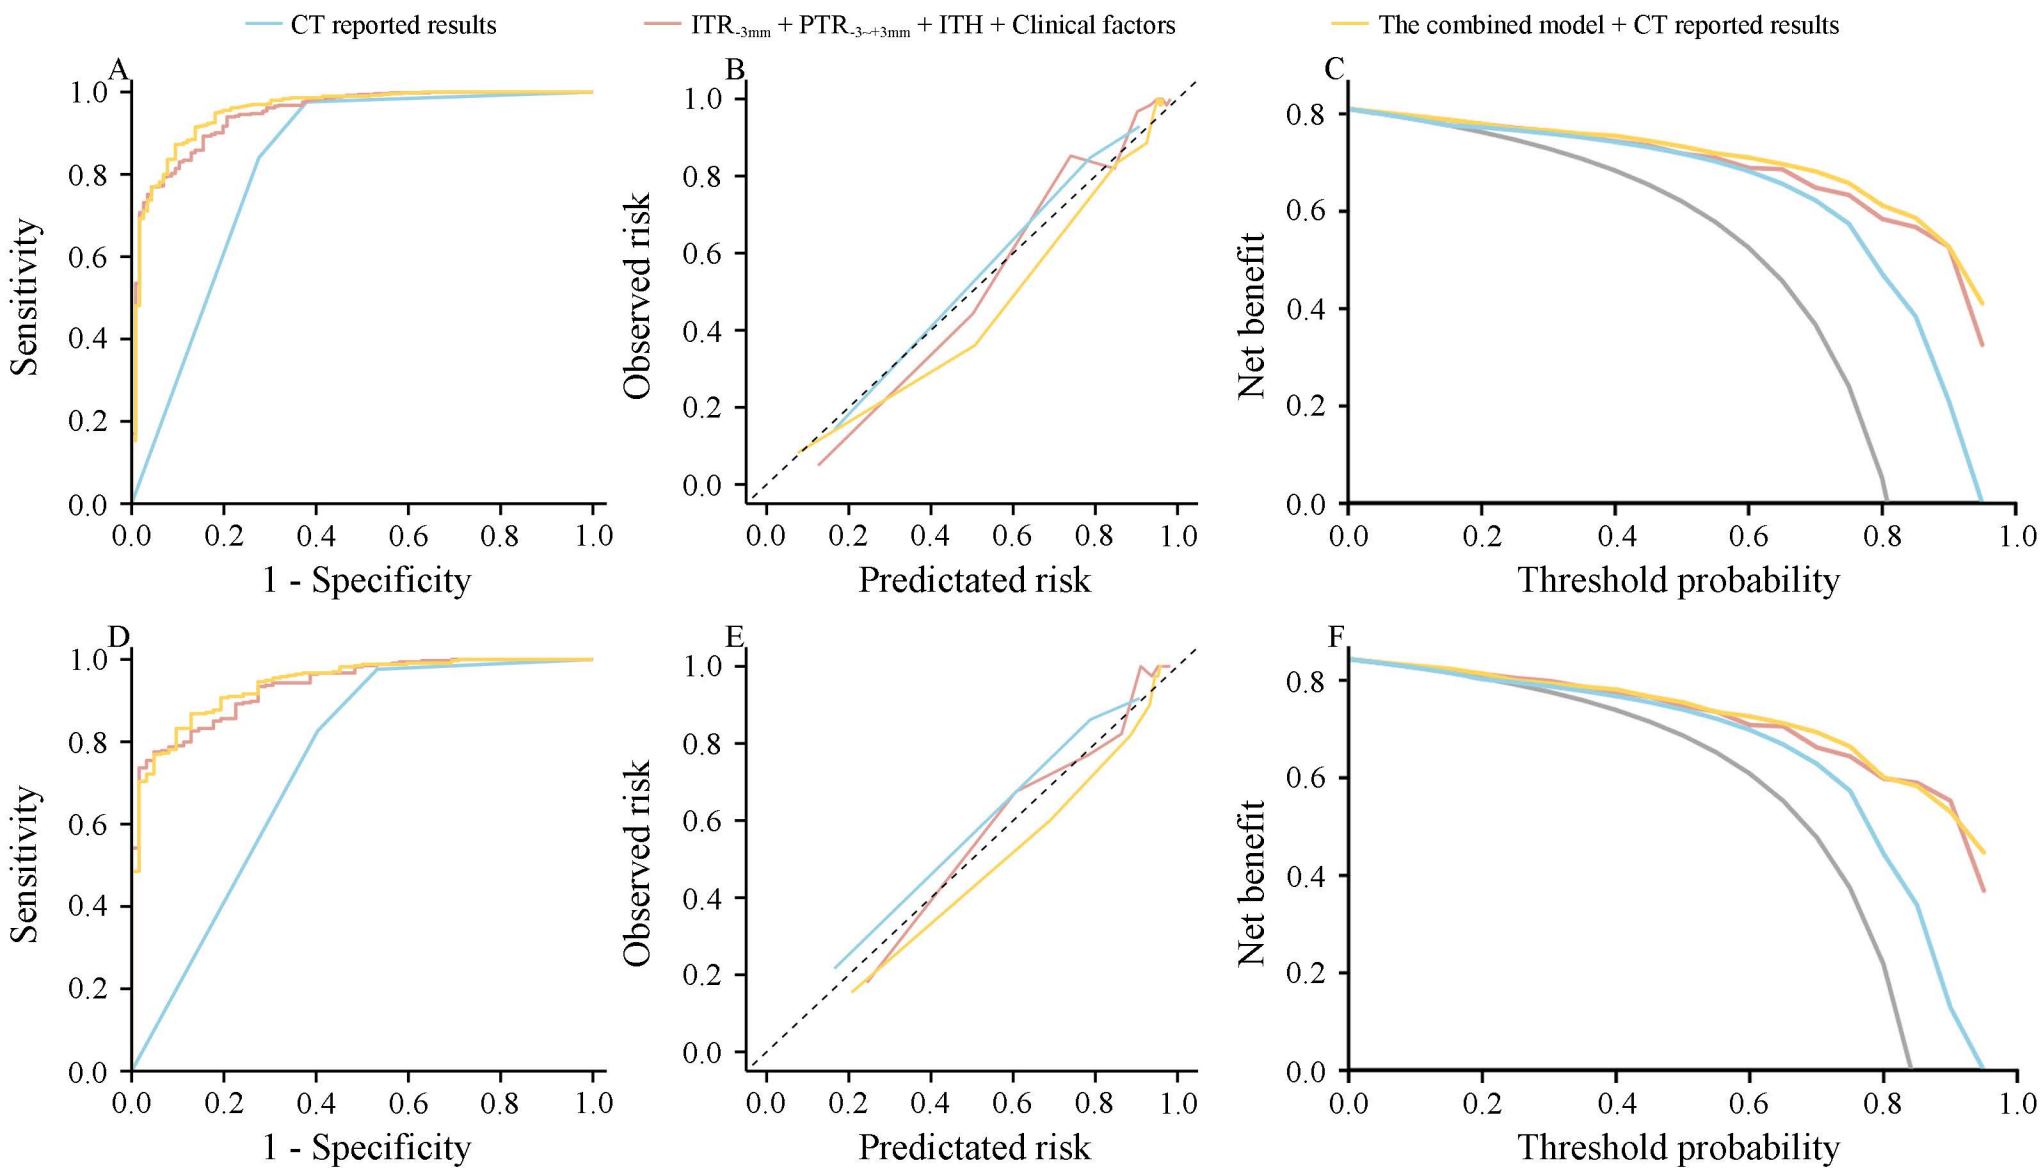

Supplement: 40644_2024_775_MOESM2_ESM.pdf [file 40644_2024_775_MOESM2_ESM.pdf]
